# Supplementary material
Source: Copernicus journal article supplement (doi:10.5194/hess-30-4057-2026)
Supplement: Supplementary file 1 [file hess-30-4057-2026-supplement.pdf]

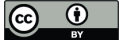

*Supplement of*

## **Assessing deficiencies in remotely sensed actual evapotranspiration (AET): introducing AET signatures**

**Hansini Gardiya Weligamage et al.**

*Correspondence to:* Hansini Gardiya Weligamage ([h.gardiyaweligamage@unimelb.edu.au](mailto:h.gardiyaweligamage@unimelb.edu.au))

The copyright of individual parts of the supplement might differ from the article licence.

This supporting information contains:

- Figure S1: Conventional efficiency metrics values at flux towers using remotely sensed AET ( $AET_{RS}$ ) and flux tower AET ( $AET_{Fluxtower}$ ).

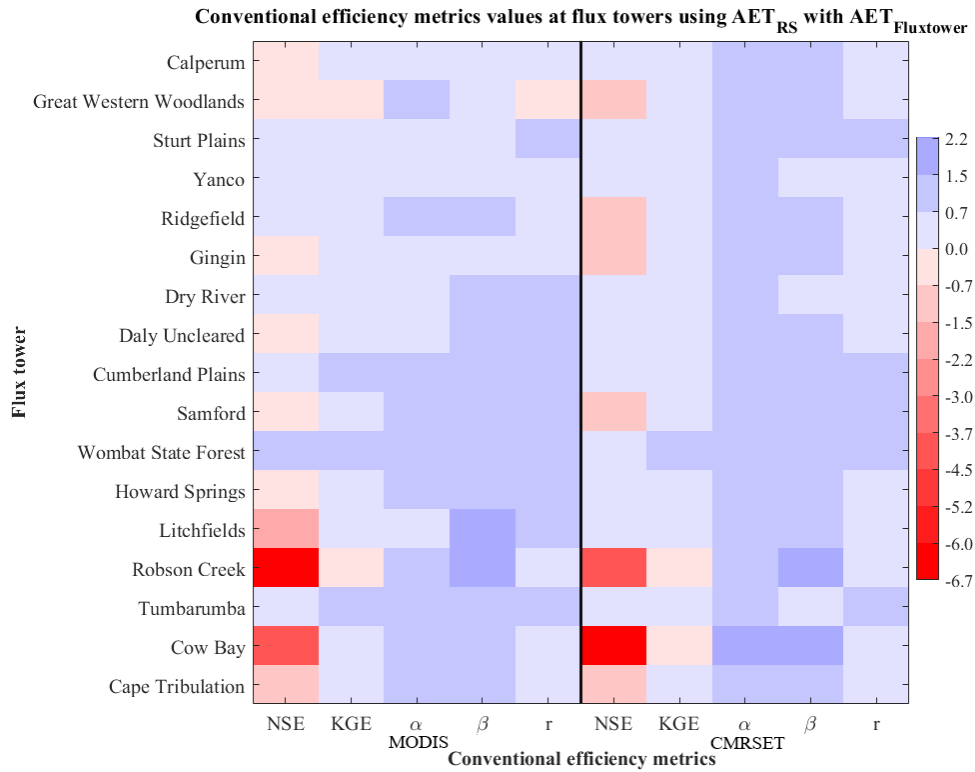

*Figure S1: Conventional efficiency metrics values at flux towers using  $AET_{RS}$  with  $AET_{Fluxtower}$ .*
